# Supplementary material for: Charge transfer modulation in charge transfer co-crystals driven by crystal structure morphology
Source: Royal Society of Chemistry journal article supplement (doi:10.1039/d2cp01408d), 2022-01-01
Supplement: d2cp01408d1.pdf [file d2cp01408d1.pdf]

## SUPPORTING INFORMATION

### Charge transfer modulation in Charge Transfer co-crystal driven by crystal structure morphology

**Federica Solano<sup>1</sup>, Paolo Inaudi<sup>1\*</sup>, Ornella Abollino<sup>1</sup>, Agnese Giacomino<sup>1</sup>, Mario Chiesa<sup>2</sup>, Enrico Salvadori<sup>2</sup>, Gabriele Kociok-Kohn<sup>3</sup>, Enrico da Como<sup>4\*</sup>, Tommaso Salzillo<sup>5</sup>, Claudio Fontanesi<sup>6,7\*</sup>**

<sup>1</sup> *Department of Drug Science and Technology, University of Torino, Via Giuria 9, Torino, Italy*

<sup>2</sup> *Department of Chemistry, University of Torino, Via Giuria 5, Torino, Italy*

<sup>3</sup> *Material and Chemical Characterization Facility (MC2), University of Bath, Claverton Down, Bath BA2 7AY, United Kingdom*

<sup>4</sup> *Department of Physics, University of Bath, BA2 7AY, United Kingdom*

<sup>5</sup> *Department of Industrial Chemistry, "Toso Montanari", University of Bologna, Viale del Risorgimento 4, Bologna, Italy.*

<sup>6</sup> *University of Modena and Reggio Emilia, DIEF, via Vivarelli 10, 41125 Modena, Italy*

<sup>7</sup> *National Interuniversity Consortium of Materials Science and Technology (INSTM), Via G. Giusti 9, 50121 Firenze (FI), Italy.*

## Content

1. Estimation of HOMO and LUMO from  $E_{\text{ONSET}}$
2. Additional electrochemical results
3. Theoretical results: Localized Orbitals

### 1. Estimation of HOMO and LUMO from $E_{\text{ONSET}}$

Energy of HOMO and LUMO were calculated from  $E_{\text{ONSET}}$  as<sup>1</sup>

$$\text{HOMO} = -E_{\text{onset,ox}} (4,8 - E_{\text{onset,ox fc}}) [\text{eV}]$$

$$\text{LUMO} = -E_{\text{onset,red}} (4,8 - E_{\text{onset,ox fc}}) [\text{eV}]$$

### 2. Additional electrochemical results

CVs of PE:F4 co-crystals in the 20 50 100  $\text{mV s}^{-1}$  scan rate.

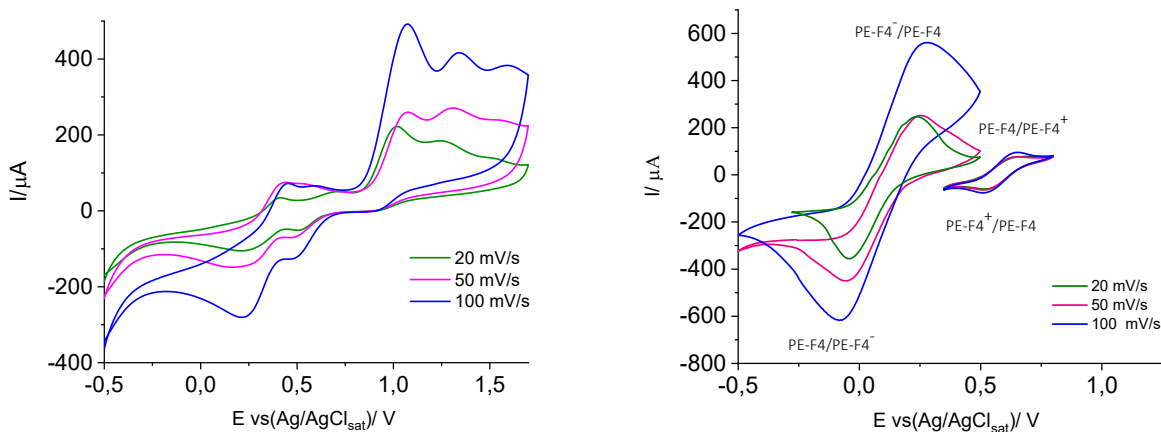

**Figure 1S.** CVs of DB:F4 co-crystal in the 0.0 to 1.6 V potential range b) CVs of PE:F4 co-crystal recorded starting from the OCP to anodic and cathodic scans. 20 50 100  $\text{mV s}^{-1}$  scan rate.

**Table 1S.** Oxidation-reductive processes of PE:F4 co-crystal

|                         |                      |                           |         |
|-------------------------|----------------------|---------------------------|---------|
| $PE:F4_{(solid)} + e^-$ | $\rightleftharpoons$ | $PE:F4_{(solid)}^-$       | $E_p^1$ |
| $PE:F4_{(solid)}$       | $\rightleftharpoons$ | $PE:DB_{(solid)}^+ + e^-$ | $E_p^2$ |

**Table 2S.**  $E$ ,  $\Delta E$ ,  $E_{1/2}$  to 20, 50, 100  $\text{mV s}^{-1}$  of PE:F4 co-crystal

| Scan rate             | $E$ (V) | $\Delta E$ (V) | $E_{1/2}$ (V) |
|-----------------------|---------|----------------|---------------|
| 20 $\text{mV s}^{-1}$ |         |                |               |
| $E_{pa}^1$            | 0.238   | 0.284          | 0.096         |
| $E_{pc}^1$            | -0.046  |                |               |
| $E_{pa}^2$            | 0.640   | 0.107          | 0.587         |
| $E_{pc}^2$            | 0.533   |                |               |

| 50 mV s <sup>-1</sup>  |        |       |       |
|------------------------|--------|-------|-------|
| $E_{pa}^1$             | 0.252  | 0.298 | 0.103 |
| $E_{pc}^1$             | -0.046 |       |       |
| $E_{pa}^2$             | 0.640  | 0.116 | 0.582 |
| $E_{pc}^2$             | 0.524  |       |       |
| 100 mV s <sup>-1</sup> |        |       |       |
| $E_{pa}^1$             | 0.278  | 0.355 | 0.101 |
| $E_{pc}^1$             | -0.077 |       |       |
| $E_{pa}^2$             | 0.645  | 0.125 | 0.583 |
| $E_{pc}^2$             | 0.520  |       |       |

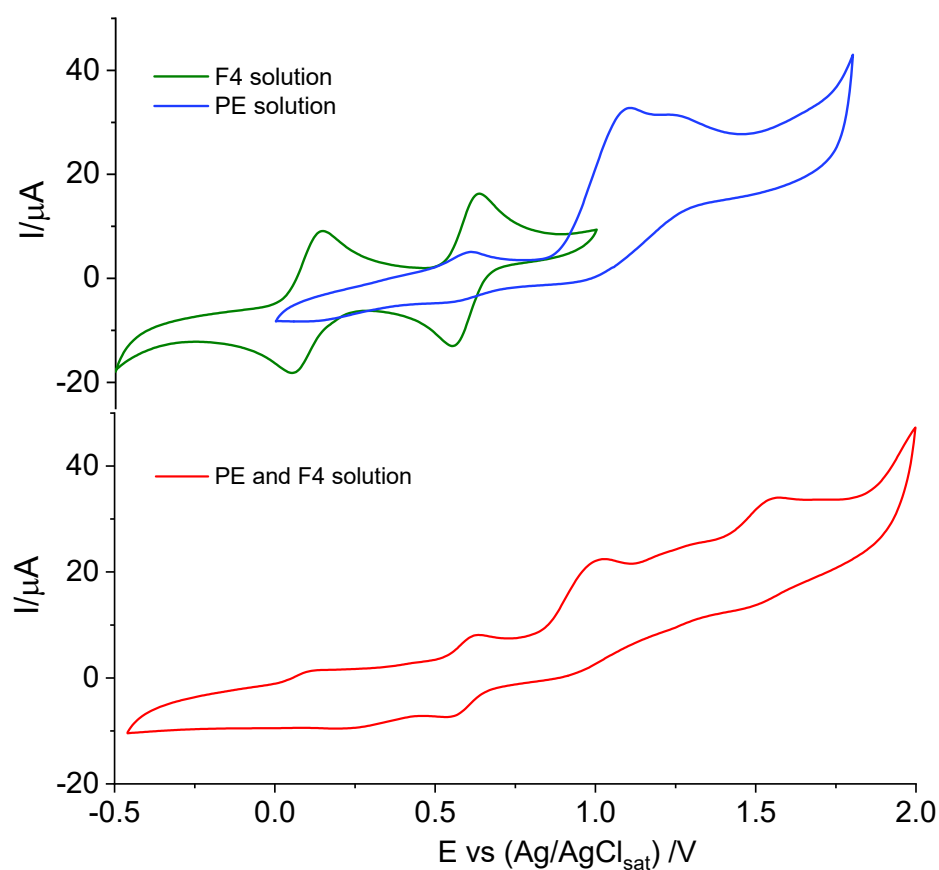

**Figure 2S.** CVs of the 1mM F4 and 1mM PE compounds in 0.1 M TBAPF<sub>6</sub> ACN solution. Figure 9b) CV of the 0.1 mM PE and 0.1mM F4 simultaneously in solution. WE: GCE, RE: Ag/AgCl/KCl<sub>sat</sub>, CE: Pt wire. 50 mV s<sup>-1</sup> is the potential scan rate.

### 3. Theoretical results

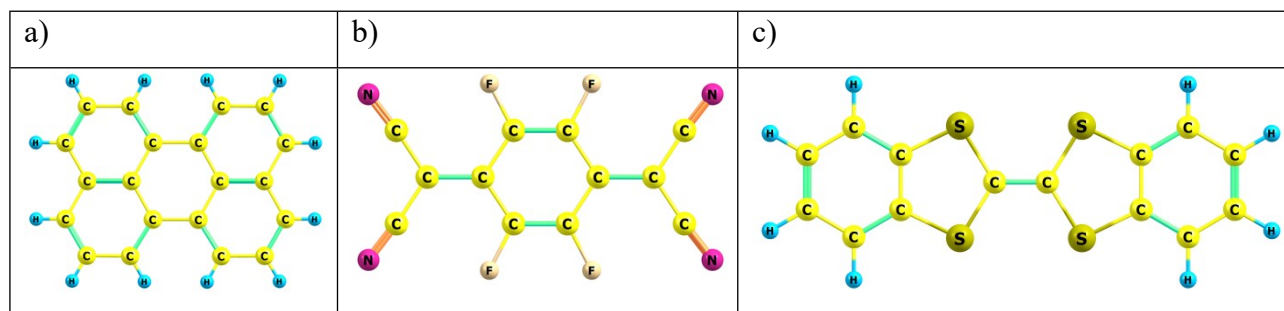

**Figure 3S.** Chemical structures. a) perylene b) 2,3,5,6-tetrafluoro-7,7,8,8-tetracyanoquinodimethane 98% purity (F4) c) Dibenzotetrathiafulvalene (DBTTF).

#### 3.1 Plane wave ELF 2D sections

##### PE:F4 triclinic $k$ -point sampling path selection

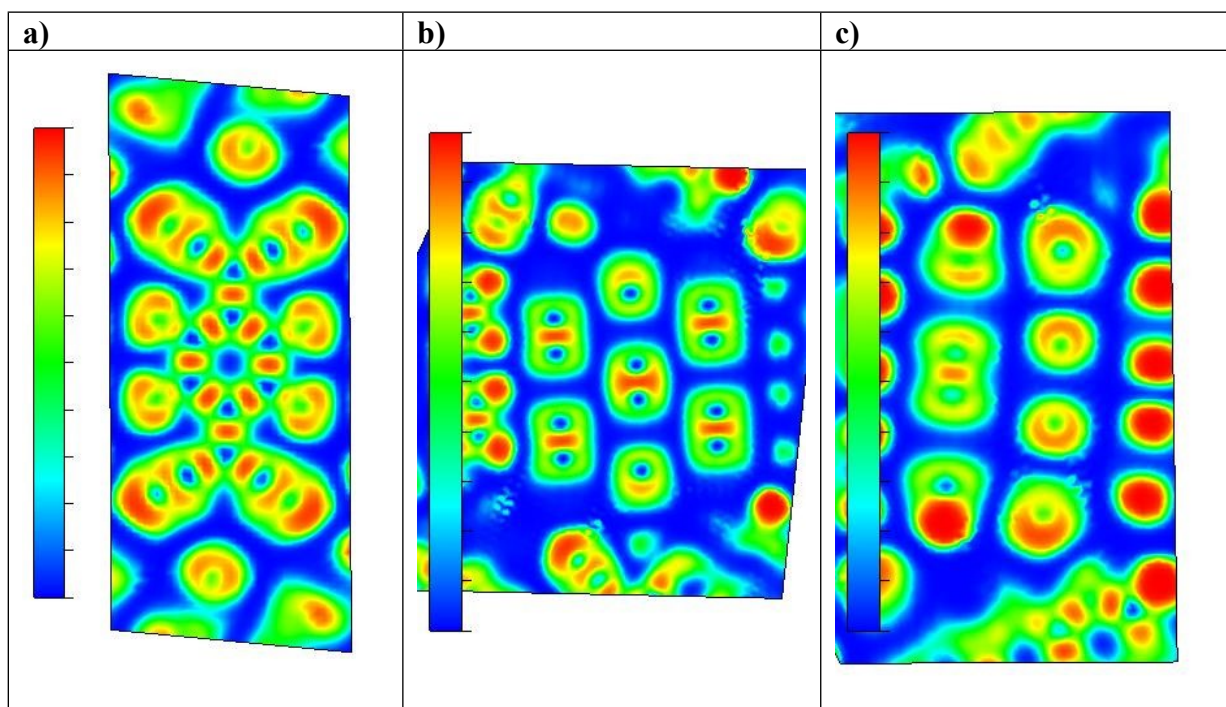

**Figure 4S.** 2D projections of ELF, relevant to the 3D plot Figure 4 main manuscript. Colour scale: blue low electron density, red high electron density. a) projection coplanar with the F4 molecule b) projection orthogonal to the F4 aromatic plane, carbon atoms only c) projection orthogonal to the F4 aromatic plane, passing through fluorine and carbon atoms.<sup>3</sup>

### 3.2 Localized Orbitals

For the sake of comparison, theoretical results obtained by using localized orbitals are here reported too. Theoretical calculations were carried out using a cluster strategy. In particular, we selected a cluster constituted by a total of three molecules: two PE and one F4, Figure 5Sa. The geometry of the cluster was maintained fixed and corresponds exactly to the one obtained by the analysis of the experimental X-ray data <sup>4</sup>, Figure 4b shows the molecular graphical representation of the PE:F4 superstructure, van der Waals radii, within the co-crystal.

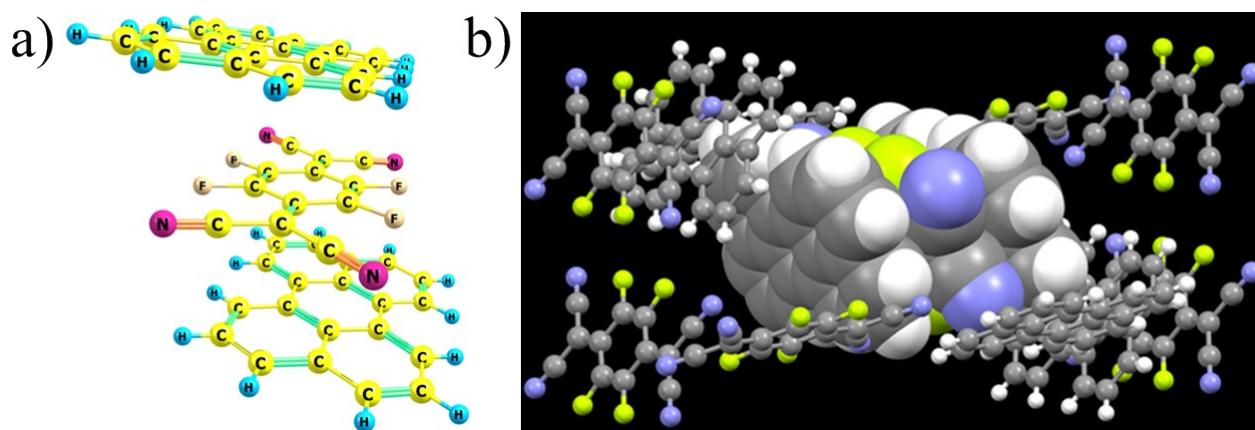

**Figure 5S.** a) Graphical representation of the PE:F4 superstructure used in the theoretical calculations, atomic coordinates were obtained from the relevant experimental, X-ray, co-crystal geometries. b) X-ray, co-crystal geometry, van der Waals radii, highlights the PE:F4 superstructure used in the calculations with the crystal geometry (reproduced with permission from <sup>4</sup>)

Table III summarizes the theoretical values of HOMO, LUMO and band gap energies, as well as total molecular electronic energy and atomic Mulliken net charge. The latter is factorized in terms of net charge found on each molecule forming the cluster, the latter is neutral as a whole. Indeed, in CT co-crystal the donor-acceptor net charge values are of great interest. The “degree” of intermolecular charge transfer can be made quantitative exploiting the Mulliken electron density decomposition scheme. In the PE:F4 co-crystal cluster the singlet is definitively the most stable electronic state, the triplet and quintet are found 26 and 73 kcal mol<sup>-1</sup> higher in energy, respectively. Thus, the PE:F4 electronic ground state has essentially singlet character, the relevant net charge on the donor and acceptor molecules is about -0.3 on the F4 and +0.15 on each PE molecule. The latter result is consistent with previously published results concerning PE:F4 co-crystals family.<sup>4</sup> The variation in the frontier orbital energies parallels the outcome obtained in terms of intermolecular charge transfer. A much more prominent charge transfer was found in the DB:F4 co-crystal, as recently reported in the literature.<sup>5</sup> Indeed, the variation of the electronic MO energies in the PE:F4 co-crystal is found smaller if compared to the results obtained in the case of DB:F4.<sup>5</sup> The trend in molecular orbital energies obtained by theoretical calculations match in a semi-quantitative way the experimental

values yielded by the analysis of the pristine and solid-state co-crystal CVs. Please compare the experimental values shown in Table I with the theoretical Table III and Table IV values.

**Table IIIS.** PE:F4 cluster. LUMO, HOMO, Mulliken net charge, energy stability values for the singlet, triplet and quintet electronic state multiplicity, UCAM-B3LYP/6-31G\* level of the theory. Compare Figure 4B for the relevant geometry.

|                                       | Singlet  | Triplet | quintet |
|---------------------------------------|----------|---------|---------|
|                                       | Vacuum   | Vacuum  | Vacuum  |
| <i>LUMO / eV</i>                      | -3.1470  | -4.4270 | -3.5502 |
| <i>HOMO / eV</i>                      | -6.3275  | -5.3405 | -3.7470 |
| <i>LUMO - HOMO / eV</i>               | +3.1804  | +0.9134 | +0.1967 |
| <i>Charge F4 / electrons</i>          | -0.28846 | -0.9884 | -0.9755 |
| <i>Energy / kcal mol<sup>-1</sup></i> | 0        | +26.5   | +72.9   |

A peculiar picture emerges in the case of the PE:F4. Due to an initial less pronounced charge transfer, the electron transfer process leads to the formation of a F4 anion, with each single PE unit much less (50%) positively charged. PE molecules of neighbour unit cell form a kind of herringbone continuous sub-structure which is able to conduct the current with great efficiency. The opposite holds for the oxidation process, here the major net charge variation is due to the PE, in the neutral co-crystal the F4 is weakly negative, now the charge is largely localized on the PE leading to a less efficient electrical conductor. In fact, in the PE:F4 the HOMO is localized on the PE and the LUMO on the F4, this at variance of the DB:F4. All in all, the theoretical results give due reason to the simply reasonable conclusions inferred by the analysis of the experimental CVs, vide-supra.

**Table IVS.** Mulliken net charges UCAM-B3LYP/6-31G\* level of the theory.

|                |          |          | <i>variation</i> |          | <i>variation</i> |
|----------------|----------|----------|------------------|----------|------------------|
|                | neutral  | anion    | <i>0→anion</i>   | cation   | <i>0→cation</i>  |
| Charge PE 1    | 0.144219 | 0.009917 | -0.1343          | 0.708971 | 0.564752         |
| Charge PE 2    | 0.144243 | 0.009882 | -0.1344          | 0.708971 | 0.564728         |
| Charge PE both | 0.28846  | 0.019799 | -0.2687          | 1.418513 | 1.130053         |
| Charge F4      | -0.28846 | -1.0198  | -0.7313          | -0.41851 | -0.13005         |

**Table VS.** Total electronic energies for three state multiplicity values: B3LYP, MP2(FC) and pure HF level of theory.

|              | Relative energy / kcal mol <sup>-1</sup> |             |             | a.u         | a.u         | a.u         |
|--------------|------------------------------------------|-------------|-------------|-------------|-------------|-------------|
|              | State multiplicity                       |             |             |             |             |             |
|              | 1                                        | 3           | 5           |             |             |             |
| B3LYP no_slv | 0                                        | 0.05046463  | 0.15219112  | -2613.90311 | -2613.85265 | -2613.75092 |
| B3LYP slv    | 0                                        | 0.05286564  | 0.09639076  | -2613.92501 | -2613.87214 | -2613.82862 |
| MP2          | 0                                        | 0.41452951  | 0.45304633  | -2606.18507 | -2605.77054 | -2605.73202 |
| HF           | 0                                        | -0.08603449 | -0.00247924 | -2598.26467 | -2598.35070 | -2598.26715 |

**Table VIS.** HOMO, LUMO and HOMO-LUMO gap energies, singlet and triplet states: B3LYP, MP2(FC) and pure HF level of theory.

|              | Multiplicity = 1 |              |                               | Multiplicity = 3 |             |                               |
|--------------|------------------|--------------|-------------------------------|------------------|-------------|-------------------------------|
|              | HOMO             | LUMO         | $\Delta_{(\text{HOMO,LUMO})}$ | HOMO             | LUMO        | $\Delta_{(\text{HOMO,LUMO})}$ |
|              | eV               |              |                               |                  |             |                               |
| B3LYP no_slv | -5.25211092      | -3.814794204 | 1.437316712                   | -4.96557277      | -5.30843893 | -0.34286616                   |
| B3LYP slv    | -5.25809747      | -3.957382988 | 1.30071448                    | -5.01237672      | -5.48449798 | -0.47212126                   |
| MP2          | -6.58847259      | -1.41092146  | 5.177551132                   | -7.81762056      | -1.93637746 | 5.881243108                   |
| HF           | -6.58847259      | -1.41092146  | 5.177551132                   | -7.81762056      | -1.93637746 | 5.881243108                   |

## References

- 1 S.-S. Sun and L. R. Dalton, *Introduction to Organic Electronic and Optoelectronic Materials and Devices*, CRC Press Taylor & Francis Group, 1st edn., 2008.
- 2 A. Kokalj, XCrySDen—a new program for displaying crystalline structures and electron densities, *J. Mol. Graph. Model.*, 1999, **17**, 176–179.
- 3 K. Momma and F. Izumi, VESTA 3 for three-dimensional visualization of crystal, volumetric and morphology data, *J. Appl. Crystallogr.*, 2011, **44**, 1272–1276.
- 4 T. Salzillo, M. Masino, G. Kociok-Köhn, D. Di Nuzzo, E. Venuti, R. G. Della Valle, D. Vanossi, C. Fontanesi, A. Girlando, A. Brillante and E. Da Como, Structure, Stoichiometry, and Charge Transfer in Cocrystals of Perylene with TCNQ-Fx, *Cryst. Growth Des.*, 2016, **16**, 3028–3036.
- 5 F. Solano, P. Inaudi, M. Chiesa, G. Kociok-Köhn, E. Salvadori, E. Da Como, D. Vanossi, M. Malandrino, R. Carmieli, A. Giacomino and C. Fontanesi, Spin Multiplicity and Solid-State Electrochemical Behavior in Charge-Transfer Co-crystals of DBTTF/F4TCNQ, *J. Phys. Chem. C*, 2021, **125**, 8677–8683.

In the following the cif file corresponding to the full relaxation (molecular coordinates and lattice vectors), plane waves pbc (2731.97 Å<sup>3</sup> the cell volume):

#=====

# CRYSTAL DATA

#-----

data\_VESTA\_phase\_1

\_chemical\_name\_common 'PE F4 '  
\_cell\_length\_a 7.09431  
\_cell\_length\_b 18.87624  
\_cell\_length\_c 22.01803  
\_cell\_angle\_alpha 111.72211  
\_cell\_angle\_beta 89.97784  
\_cell\_angle\_gamma 93.86243  
\_space\_group\_name\_H-M\_alt 'P 1'  
\_space\_group\_IT\_number 1

loop\_

\_space\_group\_symop\_operation\_xyz  
'x, y, z'

loop\_

\_atom\_site\_label  
\_atom\_site\_occupancy  
\_atom\_site\_fract\_x  
\_atom\_site\_fract\_y  
\_atom\_site\_fract\_z  
\_atom\_site\_adp\_type  
\_atom\_site\_B\_iso\_or\_equiv  
\_atom\_site\_type\_symbol

|    |     |          |          |          |      |          |   |
|----|-----|----------|----------|----------|------|----------|---|
| N1 | 1.0 | 0.751718 | 0.745379 | 0.054904 | Biso | 1.000000 | N |
| N2 | 1.0 | 0.248282 | 0.254621 | 0.945096 | Biso | 1.000000 | N |
| N3 | 1.0 | 0.308071 | 0.742917 | 0.134826 | Biso | 1.000000 | N |
| N4 | 1.0 | 0.691930 | 0.257083 | 0.865174 | Biso | 1.000000 | N |
| N5 | 1.0 | 0.186809 | 0.249811 | 0.443161 | Biso | 1.000000 | N |
| N6 | 1.0 | 0.813191 | 0.750189 | 0.556839 | Biso | 1.000000 | N |
| N7 | 1.0 | 0.743119 | 0.262062 | 0.365114 | Biso | 1.000000 | N |
| N8 | 1.0 | 0.256881 | 0.737938 | 0.634886 | Biso | 1.000000 | N |



|     |     |          |          |          |      |          |   |
|-----|-----|----------|----------|----------|------|----------|---|
| N9  | 1.0 | 0.392872 | 0.139635 | 0.107725 | Biso | 1.000000 | N |
| N10 | 1.0 | 0.607128 | 0.860365 | 0.892275 | Biso | 1.000000 | N |
| N11 | 1.0 | 0.104005 | 0.919627 | 0.020491 | Biso | 1.000000 | N |
| N12 | 1.0 | 0.895995 | 0.080373 | 0.979509 | Biso | 1.000000 | N |
| N13 | 1.0 | 0.404824 | 0.079698 | 0.480996 | Biso | 1.000000 | N |
| N14 | 1.0 | 0.595176 | 0.920302 | 0.519004 | Biso | 1.000000 | N |
| N15 | 1.0 | 0.128248 | 0.857183 | 0.392545 | Biso | 1.000000 | N |
| N16 | 1.0 | 0.871752 | 0.142817 | 0.607455 | Biso | 1.000000 | N |
| F1  | 1.0 | 0.694492 | 0.575964 | 0.991684 | Biso | 1.000000 | F |
| F2  | 1.0 | 0.305508 | 0.424036 | 0.008316 | Biso | 1.000000 | F |
| F3  | 1.0 | 0.323857 | 0.572811 | 0.066712 | Biso | 1.000000 | F |
| F4  | 1.0 | 0.676143 | 0.427189 | 0.933288 | Biso | 1.000000 | F |
| F5  | 1.0 | 0.173376 | 0.419112 | 0.506406 | Biso | 1.000000 | F |
| F6  | 1.0 | 0.826624 | 0.580888 | 0.493594 | Biso | 1.000000 | F |
| F7  | 1.0 | 0.805595 | 0.432046 | 0.435040 | Biso | 1.000000 | F |
| F8  | 1.0 | 0.194405 | 0.567954 | 0.564960 | Biso | 1.000000 | F |
| F9  | 1.0 | 0.413077 | 0.132911 | 0.245693 | Biso | 1.000000 | F |
| F10 | 1.0 | 0.586923 | 0.867089 | 0.754306 | Biso | 1.000000 | F |
| F11 | 1.0 | 0.089862 | 0.886072 | 0.143923 | Biso | 1.000000 | F |
| F12 | 1.0 | 0.910138 | 0.113928 | 0.856077 | Biso | 1.000000 | F |
| F13 | 1.0 | 0.421380 | 0.112883 | 0.357234 | Biso | 1.000000 | F |
| F14 | 1.0 | 0.578620 | 0.887117 | 0.642766 | Biso | 1.000000 | F |
| F15 | 1.0 | 0.099226 | 0.865871 | 0.255688 | Biso | 1.000000 | F |
| F16 | 1.0 | 0.900774 | 0.134129 | 0.744312 | Biso | 1.000000 | F |
| C1  | 1.0 | 0.848160 | 0.539791 | 0.996511 | Biso | 1.000000 | C |
| C2  | 1.0 | 0.151840 | 0.460209 | 0.003489 | Biso | 1.000000 | C |
| C3  | 1.0 | 0.010674 | 0.583607 | 0.032655 | Biso | 1.000000 | C |
| C4  | 1.0 | 0.989326 | 0.416393 | 0.967345 | Biso | 1.000000 | C |
| C5  | 1.0 | 0.161643 | 0.538130 | 0.034006 | Biso | 1.000000 | C |
| C6  | 1.0 | 0.838357 | 0.461870 | 0.965994 | Biso | 1.000000 | C |
| C7  | 1.0 | 0.021014 | 0.663976 | 0.064056 | Biso | 1.000000 | C |
| C8  | 1.0 | 0.978986 | 0.336024 | 0.935944 | Biso | 1.000000 | C |
| C9  | 1.0 | 0.872557 | 0.708194 | 0.059455 | Biso | 1.000000 | C |
| C10 | 1.0 | 0.127443 | 0.291806 | 0.940545 | Biso | 1.000000 | C |
| C11 | 1.0 | 0.180150 | 0.706178 | 0.102077 | Biso | 1.000000 | C |
| C12 | 1.0 | 0.819850 | 0.293822 | 0.897923 | Biso | 1.000000 | C |
| C13 | 1.0 | 0.337033 | 0.457796 | 0.502557 | Biso | 1.000000 | C |
| C14 | 1.0 | 0.662967 | 0.542204 | 0.497443 | Biso | 1.000000 | C |
| C15 | 1.0 | 0.488224 | 0.416448 | 0.467089 | Biso | 1.000000 | C |
| C16 | 1.0 | 0.511776 | 0.583552 | 0.532911 | Biso | 1.000000 | C |
| C17 | 1.0 | 0.651894 | 0.464301 | 0.466765 | Biso | 1.000000 | C |
| C18 | 1.0 | 0.348106 | 0.535699 | 0.533235 | Biso | 1.000000 | C |

|     |     |          |          |          |      |          |   |
|-----|-----|----------|----------|----------|------|----------|---|
| C19 | 1.0 | 0.476687 | 0.336134 | 0.435374 | Biso | 1.000000 | C |
| C20 | 1.0 | 0.523313 | 0.663866 | 0.564626 | Biso | 1.000000 | C |
| C21 | 1.0 | 0.316431 | 0.289554 | 0.439330 | Biso | 1.000000 | C |
| C22 | 1.0 | 0.683569 | 0.710446 | 0.560670 | Biso | 1.000000 | C |
| C23 | 1.0 | 0.624382 | 0.296314 | 0.397603 | Biso | 1.000000 | C |
| C24 | 1.0 | 0.375618 | 0.703686 | 0.602397 | Biso | 1.000000 | C |
| C25 | 1.0 | 0.327369 | 0.087319 | 0.119032 | Biso | 1.000000 | C |
| C26 | 1.0 | 0.672631 | 0.912681 | 0.880968 | Biso | 1.000000 | C |
| C27 | 1.0 | 0.247662 | 0.021059 | 0.127929 | Biso | 1.000000 | C |
| C28 | 1.0 | 0.752338 | 0.978940 | 0.872071 | Biso | 1.000000 | C |
| C29 | 1.0 | 0.168135 | 0.964514 | 0.069964 | Biso | 1.000000 | C |
| C30 | 1.0 | 0.831865 | 0.035486 | 0.930036 | Biso | 1.000000 | C |
| C31 | 1.0 | 0.251687 | 0.010541 | 0.188140 | Biso | 1.000000 | C |
| C32 | 1.0 | 0.748313 | 0.989459 | 0.811860 | Biso | 1.000000 | C |
| C33 | 1.0 | 0.333304 | 0.066507 | 0.247016 | Biso | 1.000000 | C |
| C34 | 1.0 | 0.666696 | 0.933493 | 0.752984 | Biso | 1.000000 | C |
| C35 | 1.0 | 0.337708 | 0.056207 | 0.305432 | Biso | 1.000000 | C |
| C36 | 1.0 | 0.662292 | 0.943793 | 0.694568 | Biso | 1.000000 | C |
| C37 | 1.0 | 0.260689 | 0.988104 | 0.313020 | Biso | 1.000000 | C |
| C38 | 1.0 | 0.739311 | 0.011895 | 0.686980 | Biso | 1.000000 | C |
| C39 | 1.0 | 0.179458 | 0.931986 | 0.254109 | Biso | 1.000000 | C |
| C40 | 1.0 | 0.820542 | 0.068014 | 0.745891 | Biso | 1.000000 | C |
| C41 | 1.0 | 0.174655 | 0.942416 | 0.195735 | Biso | 1.000000 | C |
| C42 | 1.0 | 0.825345 | 0.057584 | 0.804265 | Biso | 1.000000 | C |
| C43 | 1.0 | 0.264252 | 0.977708 | 0.373311 | Biso | 1.000000 | C |
| C44 | 1.0 | 0.735747 | 0.022292 | 0.626689 | Biso | 1.000000 | C |
| C45 | 1.0 | 0.341968 | 0.034687 | 0.431505 | Biso | 1.000000 | C |
| C46 | 1.0 | 0.658032 | 0.965313 | 0.568495 | Biso | 1.000000 | C |
| C47 | 1.0 | 0.188987 | 0.910626 | 0.381812 | Biso | 1.000000 | C |
| C48 | 1.0 | 0.811013 | 0.089374 | 0.618188 | Biso | 1.000000 | C |
| C49 | 1.0 | 0.020191 | 0.641253 | 0.212357 | Biso | 1.000000 | C |
| C50 | 1.0 | 0.979809 | 0.358747 | 0.787643 | Biso | 1.000000 | C |
| C51 | 1.0 | 0.868560 | 0.682635 | 0.204816 | Biso | 1.000000 | C |
| C52 | 1.0 | 0.131440 | 0.317365 | 0.795184 | Biso | 1.000000 | C |
| C53 | 1.0 | 0.707324 | 0.644831 | 0.169059 | Biso | 1.000000 | C |
| C54 | 1.0 | 0.292676 | 0.355169 | 0.830941 | Biso | 1.000000 | C |
| C55 | 1.0 | 0.694122 | 0.565114 | 0.139339 | Biso | 1.000000 | C |
| C56 | 1.0 | 0.305878 | 0.434886 | 0.860661 | Biso | 1.000000 | C |
| C57 | 1.0 | 0.840794 | 0.521352 | 0.144254 | Biso | 1.000000 | C |
| C58 | 1.0 | 0.159206 | 0.478648 | 0.855746 | Biso | 1.000000 | C |
| C59 | 1.0 | 0.828928 | 0.438402 | 0.111812 | Biso | 1.000000 | C |
| C60 | 1.0 | 0.171072 | 0.561598 | 0.888188 | Biso | 1.000000 | C |

|      |     |          |          |          |      |          |   |
|------|-----|----------|----------|----------|------|----------|---|
| C61  | 1.0 | 0.670132 | 0.398165 | 0.073968 | Biso | 1.000000 | C |
| C62  | 1.0 | 0.329868 | 0.601835 | 0.926032 | Biso | 1.000000 | C |
| C63  | 1.0 | 0.659224 | 0.318790 | 0.041589 | Biso | 1.000000 | C |
| C64  | 1.0 | 0.340776 | 0.681210 | 0.958411 | Biso | 1.000000 | C |
| C65  | 1.0 | 0.808443 | 0.277632 | 0.046850 | Biso | 1.000000 | C |
| C66  | 1.0 | 0.191557 | 0.722368 | 0.953150 | Biso | 1.000000 | C |
| C67  | 1.0 | 0.971558 | 0.315199 | 0.085308 | Biso | 1.000000 | C |
| C68  | 1.0 | 0.028442 | 0.684801 | 0.914692 | Biso | 1.000000 | C |
| C69  | 1.0 | 0.123209 | 0.273253 | 0.091675 | Biso | 1.000000 | C |
| C70  | 1.0 | 0.876791 | 0.726747 | 0.908325 | Biso | 1.000000 | C |
| C71  | 1.0 | 0.281353 | 0.310692 | 0.129402 | Biso | 1.000000 | C |
| C72  | 1.0 | 0.718647 | 0.689308 | 0.870598 | Biso | 1.000000 | C |
| C73  | 1.0 | 0.294360 | 0.390338 | 0.160746 | Biso | 1.000000 | C |
| C74  | 1.0 | 0.705640 | 0.609662 | 0.839254 | Biso | 1.000000 | C |
| C75  | 1.0 | 0.149142 | 0.434548 | 0.155921 | Biso | 1.000000 | C |
| C76  | 1.0 | 0.850858 | 0.565452 | 0.844079 | Biso | 1.000000 | C |
| C77  | 1.0 | 0.983703 | 0.396677 | 0.117840 | Biso | 1.000000 | C |
| C78  | 1.0 | 0.016297 | 0.603323 | 0.882160 | Biso | 1.000000 | C |
| C79  | 1.0 | 0.161068 | 0.517765 | 0.188512 | Biso | 1.000000 | C |
| C80  | 1.0 | 0.838932 | 0.482235 | 0.811488 | Biso | 1.000000 | C |
| C81  | 1.0 | 0.007641 | 0.559596 | 0.181373 | Biso | 1.000000 | C |
| C82  | 1.0 | 0.992359 | 0.440404 | 0.818627 | Biso | 1.000000 | C |
| C83  | 1.0 | 0.317993 | 0.558302 | 0.226950 | Biso | 1.000000 | C |
| C84  | 1.0 | 0.682007 | 0.441698 | 0.773051 | Biso | 1.000000 | C |
| C85  | 1.0 | 0.328944 | 0.638048 | 0.257559 | Biso | 1.000000 | C |
| C86  | 1.0 | 0.671056 | 0.361952 | 0.742441 | Biso | 1.000000 | C |
| C87  | 1.0 | 0.183328 | 0.679444 | 0.250326 | Biso | 1.000000 | C |
| C88  | 1.0 | 0.816672 | 0.320556 | 0.749674 | Biso | 1.000000 | C |
| C89  | 1.0 | 0.526508 | 0.685447 | 0.415748 | Biso | 1.000000 | C |
| C90  | 1.0 | 0.473492 | 0.314553 | 0.584252 | Biso | 1.000000 | C |
| C91  | 1.0 | 0.691408 | 0.728960 | 0.410331 | Biso | 1.000000 | C |
| C92  | 1.0 | 0.308592 | 0.271040 | 0.589669 | Biso | 1.000000 | C |
| C93  | 1.0 | 0.838519 | 0.693530 | 0.372644 | Biso | 1.000000 | C |
| C94  | 1.0 | 0.161481 | 0.306470 | 0.627356 | Biso | 1.000000 | C |
| C95  | 1.0 | 0.827228 | 0.613921 | 0.340691 | Biso | 1.000000 | C |
| C96  | 1.0 | 0.172772 | 0.386079 | 0.659308 | Biso | 1.000000 | C |
| C97  | 1.0 | 0.668847 | 0.568014 | 0.344964 | Biso | 1.000000 | C |
| C98  | 1.0 | 0.331153 | 0.431986 | 0.655036 | Biso | 1.000000 | C |
| C99  | 1.0 | 0.656416 | 0.484784 | 0.312132 | Biso | 1.000000 | C |
| C100 | 1.0 | 0.343584 | 0.515216 | 0.687868 | Biso | 1.000000 | C |
| C101 | 1.0 | 0.802159 | 0.445683 | 0.274479 | Biso | 1.000000 | C |
| C102 | 1.0 | 0.197841 | 0.554317 | 0.725522 | Biso | 1.000000 | C |

|      |     |          |          |          |      |          |   |
|------|-----|----------|----------|----------|------|----------|---|
| C103 | 1.0 | 0.789366 | 0.365908 | 0.243788 | Biso | 1.000000 | C |
| C104 | 1.0 | 0.210634 | 0.634092 | 0.756212 | Biso | 1.000000 | C |
| C105 | 1.0 | 0.630560 | 0.323029 | 0.250088 | Biso | 1.000000 | C |
| C106 | 1.0 | 0.369440 | 0.676970 | 0.749912 | Biso | 1.000000 | C |
| C107 | 1.0 | 0.478044 | 0.359691 | 0.287237 | Biso | 1.000000 | C |
| C108 | 1.0 | 0.521955 | 0.640309 | 0.712763 | Biso | 1.000000 | C |
| C109 | 1.0 | 0.313466 | 0.316734 | 0.293967 | Biso | 1.000000 | C |
| C110 | 1.0 | 0.686534 | 0.683266 | 0.706033 | Biso | 1.000000 | C |
| C111 | 1.0 | 0.163318 | 0.352804 | 0.329433 | Biso | 1.000000 | C |
| C112 | 1.0 | 0.836682 | 0.647196 | 0.670567 | Biso | 1.000000 | C |
| C113 | 1.0 | 0.174311 | 0.432466 | 0.359529 | Biso | 1.000000 | C |
| C114 | 1.0 | 0.825689 | 0.567534 | 0.640471 | Biso | 1.000000 | C |
| C115 | 1.0 | 0.334091 | 0.477797 | 0.355164 | Biso | 1.000000 | C |
| C116 | 1.0 | 0.665909 | 0.522203 | 0.644836 | Biso | 1.000000 | C |
| C117 | 1.0 | 0.489916 | 0.441322 | 0.318442 | Biso | 1.000000 | C |
| C118 | 1.0 | 0.510084 | 0.558678 | 0.681558 | Biso | 1.000000 | C |
| C119 | 1.0 | 0.346562 | 0.560697 | 0.387949 | Biso | 1.000000 | C |
| C120 | 1.0 | 0.653438 | 0.439303 | 0.612051 | Biso | 1.000000 | C |
| C121 | 1.0 | 0.514223 | 0.604070 | 0.382705 | Biso | 1.000000 | C |
| C122 | 1.0 | 0.485777 | 0.395930 | 0.617295 | Biso | 1.000000 | C |
| C123 | 1.0 | 0.199142 | 0.599278 | 0.425305 | Biso | 1.000000 | C |
| C124 | 1.0 | 0.800858 | 0.400722 | 0.574695 | Biso | 1.000000 | C |
| C125 | 1.0 | 0.212111 | 0.678606 | 0.458073 | Biso | 1.000000 | C |
| C126 | 1.0 | 0.787889 | 0.321394 | 0.541927 | Biso | 1.000000 | C |
| C127 | 1.0 | 0.374214 | 0.721417 | 0.453761 | Biso | 1.000000 | C |
| C128 | 1.0 | 0.625786 | 0.278583 | 0.546239 | Biso | 1.000000 | C |
| C129 | 1.0 | 0.762544 | 0.033238 | 0.132762 | Biso | 1.000000 | C |
| C130 | 1.0 | 0.237456 | 0.966762 | 0.867238 | Biso | 1.000000 | C |
| C131 | 1.0 | 0.680611 | 0.977972 | 0.074421 | Biso | 1.000000 | C |
| C132 | 1.0 | 0.319389 | 0.022028 | 0.925579 | Biso | 1.000000 | C |
| C133 | 1.0 | 0.599366 | 0.909035 | 0.073847 | Biso | 1.000000 | C |
| C134 | 1.0 | 0.400634 | 0.090965 | 0.926153 | Biso | 1.000000 | C |
| C135 | 1.0 | 0.595410 | 0.893498 | 0.131124 | Biso | 1.000000 | C |
| C136 | 1.0 | 0.404590 | 0.106502 | 0.868876 | Biso | 1.000000 | C |
| C137 | 1.0 | 0.675634 | 0.946066 | 0.190152 | Biso | 1.000000 | C |
| C138 | 1.0 | 0.324366 | 0.053934 | 0.809848 | Biso | 1.000000 | C |
| C139 | 1.0 | 0.676331 | 0.929707 | 0.249672 | Biso | 1.000000 | C |
| C140 | 1.0 | 0.323669 | 0.070293 | 0.750328 | Biso | 1.000000 | C |
| C141 | 1.0 | 0.598001 | 0.859989 | 0.251122 | Biso | 1.000000 | C |
| C142 | 1.0 | 0.401999 | 0.140011 | 0.748878 | Biso | 1.000000 | C |
| C143 | 1.0 | 0.596273 | 0.845544 | 0.308835 | Biso | 1.000000 | C |
| C144 | 1.0 | 0.403727 | 0.154456 | 0.691165 | Biso | 1.000000 | C |

|      |     |          |          |          |      |          |   |
|------|-----|----------|----------|----------|------|----------|---|
| C145 | 1.0 | 0.671761 | 0.899995 | 0.366575 | Biso | 1.000000 | C |
| C146 | 1.0 | 0.328239 | 0.100005 | 0.633425 | Biso | 1.000000 | C |
| C147 | 1.0 | 0.754139 | 0.970609 | 0.367528 | Biso | 1.000000 | C |
| C148 | 1.0 | 0.245861 | 0.029391 | 0.632472 | Biso | 1.000000 | C |
| C149 | 1.0 | 0.756918 | 0.985973 | 0.308571 | Biso | 1.000000 | C |
| C150 | 1.0 | 0.243082 | 0.014027 | 0.691429 | Biso | 1.000000 | C |
| C151 | 1.0 | 0.832093 | 0.026543 | 0.426240 | Biso | 1.000000 | C |
| C152 | 1.0 | 0.167907 | 0.973457 | 0.573761 | Biso | 1.000000 | C |
| C153 | 1.0 | 0.909659 | 0.096118 | 0.427015 | Biso | 1.000000 | C |
| C154 | 1.0 | 0.090341 | 0.903882 | 0.572985 | Biso | 1.000000 | C |
| C155 | 1.0 | 0.912731 | 0.111343 | 0.369623 | Biso | 1.000000 | C |
| C156 | 1.0 | 0.087269 | 0.888657 | 0.630377 | Biso | 1.000000 | C |
| C157 | 1.0 | 0.838998 | 0.057718 | 0.310068 | Biso | 1.000000 | C |
| C158 | 1.0 | 0.161002 | 0.942282 | 0.689932 | Biso | 1.000000 | C |
| C159 | 1.0 | 0.843686 | 0.073167 | 0.250176 | Biso | 1.000000 | C |
| C160 | 1.0 | 0.156314 | 0.926833 | 0.749824 | Biso | 1.000000 | C |
| C161 | 1.0 | 0.760475 | 0.017464 | 0.191493 | Biso | 1.000000 | C |
| C162 | 1.0 | 0.239525 | 0.982536 | 0.808507 | Biso | 1.000000 | C |
| C163 | 1.0 | 0.928835 | 0.141629 | 0.248182 | Biso | 1.000000 | C |
| C164 | 1.0 | 0.071165 | 0.858371 | 0.751818 | Biso | 1.000000 | C |
| C165 | 1.0 | 0.931240 | 0.156422 | 0.190682 | Biso | 1.000000 | C |
| C166 | 1.0 | 0.068760 | 0.843578 | 0.809318 | Biso | 1.000000 | C |
| C167 | 1.0 | 0.848908 | 0.103229 | 0.133450 | Biso | 1.000000 | C |
| C168 | 1.0 | 0.151092 | 0.896771 | 0.866550 | Biso | 1.000000 | C |
| H1   | 1.0 | 0.880771 | 0.744778 | 0.228253 | Biso | 1.000000 | H |
| H2   | 1.0 | 0.119229 | 0.255222 | 0.771747 | Biso | 1.000000 | H |
| H3   | 1.0 | 0.590498 | 0.676588 | 0.163045 | Biso | 1.000000 | H |
| H4   | 1.0 | 0.409502 | 0.323412 | 0.836955 | Biso | 1.000000 | H |
| H5   | 1.0 | 0.565679 | 0.537240 | 0.111554 | Biso | 1.000000 | H |
| H6   | 1.0 | 0.434321 | 0.462760 | 0.888446 | Biso | 1.000000 | H |
| H7   | 1.0 | 0.550833 | 0.428842 | 0.068959 | Biso | 1.000000 | H |
| H8   | 1.0 | 0.449167 | 0.571158 | 0.931041 | Biso | 1.000000 | H |
| H9   | 1.0 | 0.533362 | 0.290204 | 0.011896 | Biso | 1.000000 | H |
| H10  | 1.0 | 0.466638 | 0.709796 | 0.988104 | Biso | 1.000000 | H |
| H11  | 1.0 | 0.803474 | 0.215643 | 0.021810 | Biso | 1.000000 | H |
| H12  | 1.0 | 0.196526 | 0.784357 | 0.978190 | Biso | 1.000000 | H |
| H13  | 1.0 | 0.114046 | 0.211371 | 0.066098 | Biso | 1.000000 | H |
| H14  | 1.0 | 0.885954 | 0.788629 | 0.933902 | Biso | 1.000000 | H |
| H15  | 1.0 | 0.397008 | 0.277882 | 0.134173 | Biso | 1.000000 | H |
| H16  | 1.0 | 0.602992 | 0.722118 | 0.865827 | Biso | 1.000000 | H |
| H17  | 1.0 | 0.422595 | 0.417618 | 0.189212 | Biso | 1.000000 | H |
| H18  | 1.0 | 0.577405 | 0.582382 | 0.810788 | Biso | 1.000000 | H |

|     |     |          |          |          |      |          |   |
|-----|-----|----------|----------|----------|------|----------|---|
| H19 | 1.0 | 0.436368 | 0.527918 | 0.233613 | Biso | 1.000000 | H |
| H20 | 1.0 | 0.563632 | 0.472082 | 0.766387 | Biso | 1.000000 | H |
| H21 | 1.0 | 0.454626 | 0.666777 | 0.287097 | Biso | 1.000000 | H |
| H22 | 1.0 | 0.545374 | 0.333223 | 0.712903 | Biso | 1.000000 | H |
| H23 | 1.0 | 0.190313 | 0.741486 | 0.274241 | Biso | 1.000000 | H |
| H24 | 1.0 | 0.809687 | 0.258514 | 0.725759 | Biso | 1.000000 | H |
| H25 | 1.0 | 0.700083 | 0.790599 | 0.436899 | Biso | 1.000000 | H |
| H26 | 1.0 | 0.299917 | 0.209401 | 0.563101 | Biso | 1.000000 | H |
| H27 | 1.0 | 0.964588 | 0.727592 | 0.368505 | Biso | 1.000000 | H |
| H28 | 1.0 | 0.035412 | 0.272408 | 0.631495 | Biso | 1.000000 | H |
| H29 | 1.0 | 0.947115 | 0.587970 | 0.312261 | Biso | 1.000000 | H |
| H30 | 1.0 | 0.052885 | 0.412030 | 0.687739 | Biso | 1.000000 | H |
| H31 | 1.0 | 0.930567 | 0.477190 | 0.268616 | Biso | 1.000000 | H |
| H32 | 1.0 | 0.069433 | 0.522810 | 0.731384 | Biso | 1.000000 | H |
| H33 | 1.0 | 0.907112 | 0.338147 | 0.215071 | Biso | 1.000000 | H |
| H34 | 1.0 | 0.092888 | 0.661853 | 0.784929 | Biso | 1.000000 | H |
| H35 | 1.0 | 0.620193 | 0.260894 | 0.226492 | Biso | 1.000000 | H |
| H36 | 1.0 | 0.379807 | 0.739106 | 0.773508 | Biso | 1.000000 | H |
| H37 | 1.0 | 0.307886 | 0.254700 | 0.270226 | Biso | 1.000000 | H |
| H38 | 1.0 | 0.692114 | 0.745300 | 0.729774 | Biso | 1.000000 | H |
| H39 | 1.0 | 0.036248 | 0.320046 | 0.334991 | Biso | 1.000000 | H |
| H40 | 1.0 | 0.963752 | 0.679954 | 0.665009 | Biso | 1.000000 | H |
| H41 | 1.0 | 0.054275 | 0.459083 | 0.387089 | Biso | 1.000000 | H |
| H42 | 1.0 | 0.945725 | 0.540917 | 0.612911 | Biso | 1.000000 | H |
| H43 | 1.0 | 0.070126 | 0.567352 | 0.429656 | Biso | 1.000000 | H |
| H44 | 1.0 | 0.929874 | 0.432648 | 0.570344 | Biso | 1.000000 | H |
| H45 | 1.0 | 0.094574 | 0.706060 | 0.487357 | Biso | 1.000000 | H |
| H46 | 1.0 | 0.905426 | 0.293940 | 0.512643 | Biso | 1.000000 | H |
| H47 | 1.0 | 0.387152 | 0.783417 | 0.478971 | Biso | 1.000000 | H |
| H48 | 1.0 | 0.612848 | 0.216583 | 0.521029 | Biso | 1.000000 | H |
| H49 | 1.0 | 0.684634 | 0.990562 | 0.029974 | Biso | 1.000000 | H |
| H50 | 1.0 | 0.315366 | 0.009438 | 0.970026 | Biso | 1.000000 | H |
| H51 | 1.0 | 0.539647 | 0.866368 | 0.028417 | Biso | 1.000000 | H |
| H52 | 1.0 | 0.460353 | 0.133632 | 0.971583 | Biso | 1.000000 | H |
| H53 | 1.0 | 0.530026 | 0.838753 | 0.128767 | Biso | 1.000000 | H |
| H54 | 1.0 | 0.469974 | 0.161247 | 0.871233 | Biso | 1.000000 | H |
| H55 | 1.0 | 0.533469 | 0.816571 | 0.207043 | Biso | 1.000000 | H |
| H56 | 1.0 | 0.466531 | 0.183429 | 0.792957 | Biso | 1.000000 | H |
| H57 | 1.0 | 0.532959 | 0.791261 | 0.308614 | Biso | 1.000000 | H |
| H58 | 1.0 | 0.467041 | 0.208739 | 0.691386 | Biso | 1.000000 | H |
| H59 | 1.0 | 0.666214 | 0.889976 | 0.412198 | Biso | 1.000000 | H |
| H60 | 1.0 | 0.333786 | 0.110024 | 0.587802 | Biso | 1.000000 | H |

|     |     |           |          |          |      |          |   |
|-----|-----|-----------|----------|----------|------|----------|---|
| H61 | 1.0 | 0.827945  | 0.013996 | 0.470725 | Biso | 1.000000 | H |
| H62 | 1.0 | 0.172055  | 0.986004 | 0.529275 | Biso | 1.000000 | H |
| H63 | 1.0 | 0.970283  | 0.139281 | 0.472053 | Biso | 1.000000 | H |
| H64 | 1.0 | 0.029717  | 0.860719 | 0.527947 | Biso | 1.000000 | H |
| H65 | 1.0 | 0.973716  | 0.166935 | 0.372833 | Biso | 1.000000 | H |
| H66 | 1.0 | 0.026284  | 0.833065 | 0.627167 | Biso | 1.000000 | H |
| H67 | 1.0 | 0.991973  | 0.184594 | 0.292613 | Biso | 1.000000 | H |
| H68 | 1.0 | 0.008027  | 0.815406 | 0.707387 | Biso | 1.000000 | H |
| H69 | 1.0 | 0.000423  | 0.209713 | 0.190541 | Biso | 1.000000 | H |
| H70 | 1.0 | -0.000423 | 0.790287 | 0.809459 | Biso | 1.000000 | H |
| H71 | 1.0 | 0.851931  | 0.113864 | 0.088052 | Biso | 1.000000 | H |
| H72 | 1.0 | 0.148069  | 0.886136 | 0.911948 | Biso | 1.000000 | H |
